# Supplementary material for: Green synthesis, structural analysis and anticancer activity of dihydropyrimidinone derivatives
Source: Royal Society of Chemistry journal article supplement (doi:10.1039/d1ra03969e), 2021-01-01

**Supporting Information**  
**for**  
**Green Synthesis, Structural analysis and anticancer activity of**  
**dihydropyrimidinones derivatives**

**Hirshfeld surface analysis of compounds 1.3, 1.4 and 1.5. Density Functional Theory (DFT)**  
**Calculations of compounds 1.3, 1.4 and 1.5. NMR spectra of compounds 1.3, 1.4 and 1.5.**  
**CheckCIF of compounds 1.3, 1.4 and 1.5.**

**1.Hirshfeld Calculation and surface analysis of Compounds 1.3, 1.4 and 1.5**

**Table S1.** Hirshfeld Calculation for compound 1.3

| N | Symmetry operator     | R    | Electron Density | E_ele | E_pol | E_dis | E_rep | E_tot |
|---|-----------------------|------|------------------|-------|-------|-------|-------|-------|
| 1 | -x, -y, -z            | 9.26 | B3LYP/6-31G(d,p) | -17.5 | -5.7  | -17.0 | 22.8  | -23.5 |
| 2 | x, y, z               | 7.33 | B3LYP/6-31G(d,p) | -35.0 | -10.5 | -22.1 | 38.2  | -40.4 |
| 3 | -x+1/2, y+1/2, -z+1/2 | 8.10 | B3LYP/6-31G(d,p) | -14.2 | -3.6  | -39.8 | 24.5  | -37.3 |
| 4 | -x+1/2, -y+1/2, -z    | 8.37 | B3LYP/6-31G(d,p) | -73.6 | -15.5 | -20.6 | 96.0  | -47.9 |
| 5 | x+1/2, y+1/2, z       | 9.83 | B3LYP/6-31G(d,p) | -9.8  | -2.4  | -22.8 | 16.3  | -21.9 |
| 6 | -x, -y, -z            | 6.84 | B3LYP/6-31G(d,p) | -13.2 | -4.0  | -43.7 | 19.4  | -43.0 |
| 7 | -x, y, -z+1/2         | 9.07 | B3LYP/6-31G(d,p) | 1.7   | -0.5  | -10.1 | 2.1   | -6.1  |
| 8 | x+1/2, y+1/2, z       | 9.83 | B3LYP/6-31G(d,p) | -1.0  | -0.5  | -12.7 | 6.0   | -8.8  |

**Table S2.** Hirshfeld Calculation for compound 1.4

| N  | Symmetry operator | R     | Electron Density | E_ele | E_pol | E_dis | E_rep | E_tot |
|----|-------------------|-------|------------------|-------|-------|-------|-------|-------|
| 1  | x, y, z           | 7.36  | B3LYP/6-31G(d,p) | -32.0 | -9.4  | -22.0 | 33.4  | -39.3 |
| 2  | -x, -y, -z        | 9.08  | B3LYP/6-31G(d,p) | -17.4 | -5.4  | -15.6 | 22.7  | -21.9 |
| 3  | -x, -y, -z        | 7.27  | B3LYP/6-31G(d,p) | -4.3  | -2.2  | -30.8 | 15.0  | -23.8 |
| 4  | x, y, z           | 9.78  | B3LYP/6-31G(d,p) | -0.1  | -0.5  | -12.8 | 6.0   | -7.9  |
| 5  | -x, -y, -z        | 8.37  | B3LYP/6-31G(d,p) | -73.5 | -15.5 | -20.5 | 93.5  | -49.3 |
| 6  | -x, -y, -z        | 13.15 | B3LYP/6-31G(d,p) | -0.4  | -0.1  | -2.4  | 0.0   | -2.6  |
| 7  | x, y, z           | 9.46  | B3LYP/6-31G(d,p) | -10.8 | -2.8  | -25.7 | 17.6  | -25.0 |
| 8  | -x, -y, -z        | 6.11  | B3LYP/6-31G(d,p) | -12.9 | -4.7  | -47.4 | 23.8  | -43.7 |
| 9  | -x, -y, -z        | 8.49  | B3LYP/6-31G(d,p) | -4.1  | -2.2  | -39.8 | 17.7  | -29.6 |
| 10 | -x, -y, -z        | 9.10  | B3LYP/6-31G(d,p) | 0.4   | -0.4  | -12.9 | 5.3   | -7.8  |

**Table S3.** Hirshfeld Calculation for compound **1.5**

| N | Symmetry operator | R     | Electron Density | E_ele | E_pol | E_dis | E_rep | E_tot |
|---|-------------------|-------|------------------|-------|-------|-------|-------|-------|
| 1 | -x, -y, -z        | 6.98  | B3LYP/6-31G(d,p) | -21.8 | -2.9  | -53.0 | 42.5  | -45.2 |
| 2 | x, y, z           | 7.31  | B3LYP/6-31G(d,p) | -33.6 | -9.6  | -22.0 | 34.7  | -40.3 |
| 3 | x, y, z           | 10.77 | B3LYP/6-31G(d,p) | -3.5  | -0.5  | -9.9  | 9.2   | -7.0  |
| 4 | x, y, z           | 10.47 | B3LYP/6-31G(d,p) | -8.2  | -1.5  | -17.4 | 14.2  | -16.2 |
| 5 | -x, -y, -z        | 6.11  | B3LYP/6-31G(d,p) | -9.3  | -4.1  | -41.1 | 23.3  | -34.3 |
| 6 | -x, -y, -z        | 9.44  | B3LYP/6-31G(d,p) | 2.4   | -0.8  | -16.6 | 5.9   | -8.9  |
| 7 | -x, -y, -z        | 7.92  | B3LYP/6-31G(d,p) | -70.5 | -15.1 | -21.7 | 80.3  | -55.0 |
| 8 | -x, -y, -z        | 6.86  | B3LYP/6-31G(d,p) | -19.1 | -4.8  | -54.5 | 31.0  | -52.1 |
| 9 | -x, -y, -z        | 9.69  | B3LYP/6-31G(d,p) | -7.0  | -3.8  | -13.1 | 6.1   | -17.9 |

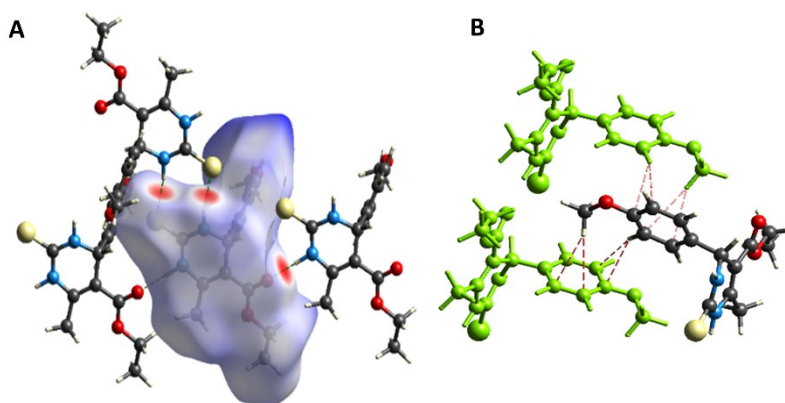

**Figure S1:** (A) Hirshfeld surface mapped on  $d_{\text{norm}}$  for compound **1.3**, (B) CH... $\pi$  interactions in weak-interactions calculations of **1.3**

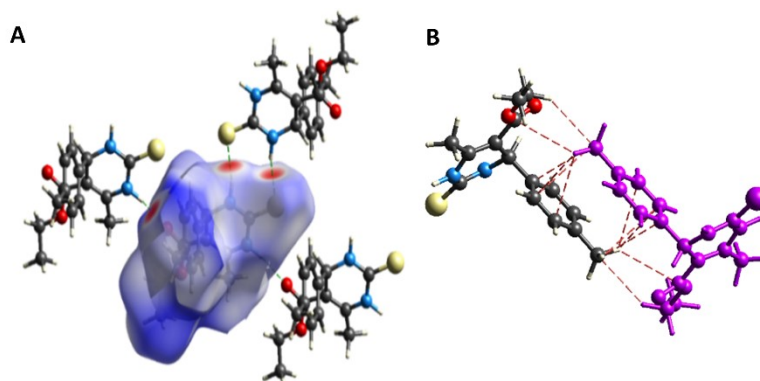

**Figure S2:** (A) Hirshfeld surface mapped on  $d_{\text{norm}}$  for compound **1.4**, (B) C-H... $\pi$  and C-H...O interactions in weak interactions calculations of **1.4**

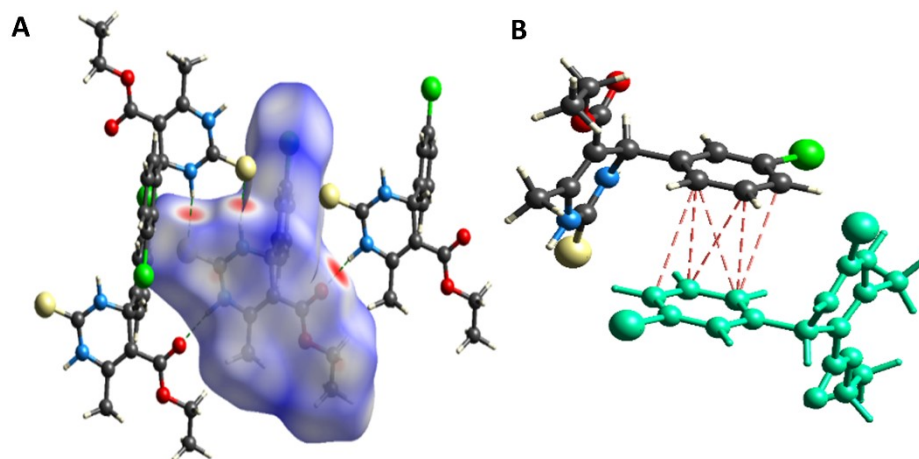

**Figure S3:** (A) Hirshfeld surface mapped on  $d_{\text{norm}}$  for compound **1.5**, (B)  $\pi\cdots\pi$  interactions in weak interactions calculations of **1.5**

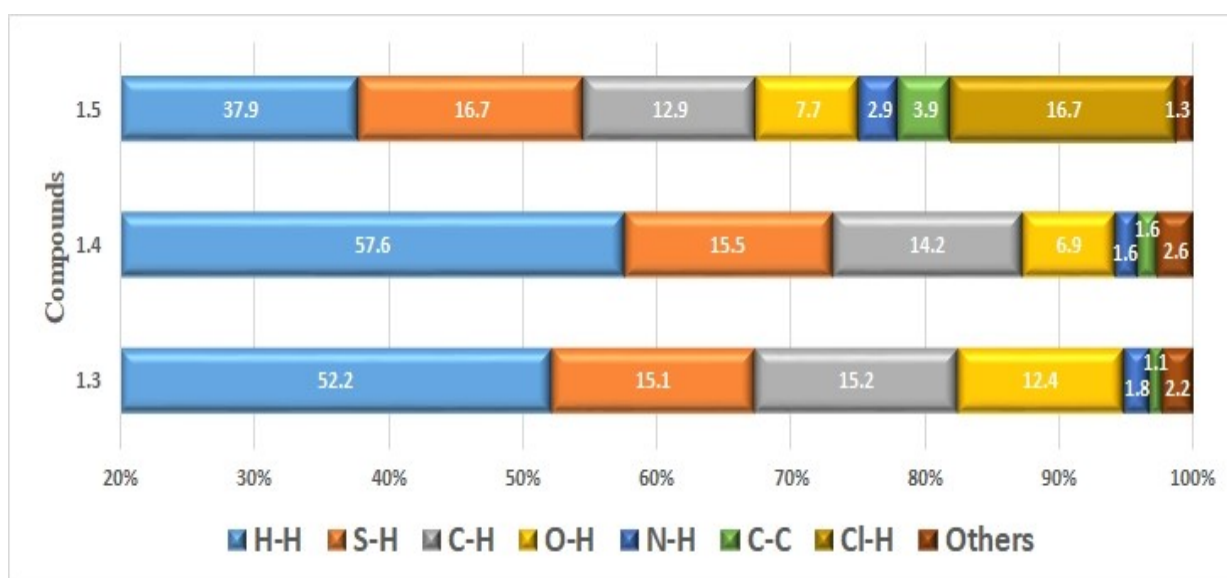

**Figure S4:** Percentage contributions in the fingerprint in compounds **1.3**, **1.4**, and **1.5** are shown in the bar graph.

## 2. Density Functional Theory (DFT) Calculations of compounds 1.3, 1.4 and 1.5

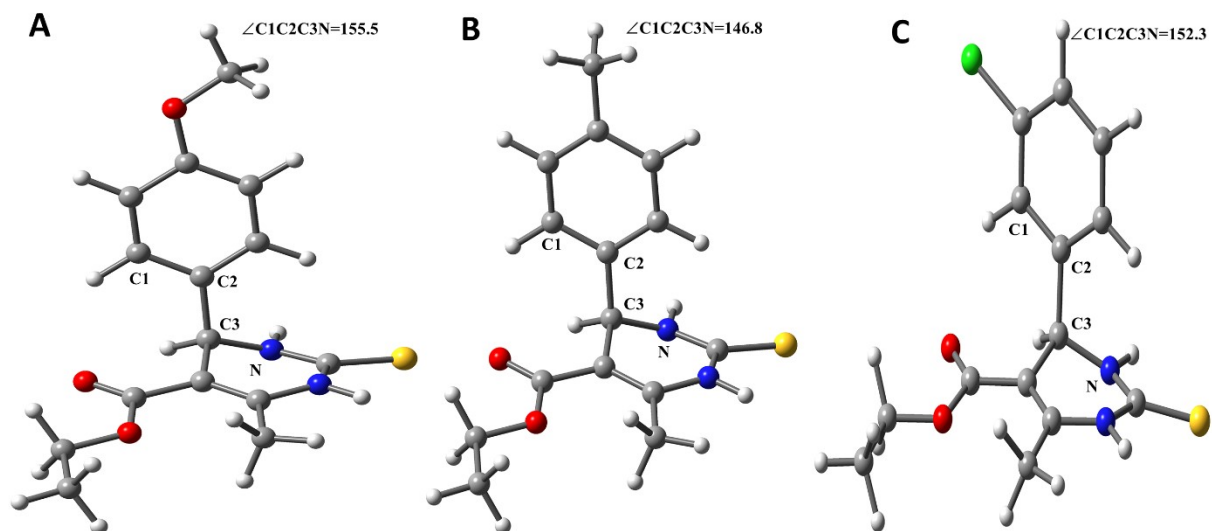

**Figure S5:** (A), (B) and (C) Optimized geometries of DHPM derivatives (**1.3**, **1.4** and **1.5**, respectively) along with torsion angle, as obtained at the M06-2X/6-31+G(d,p) level of theory.

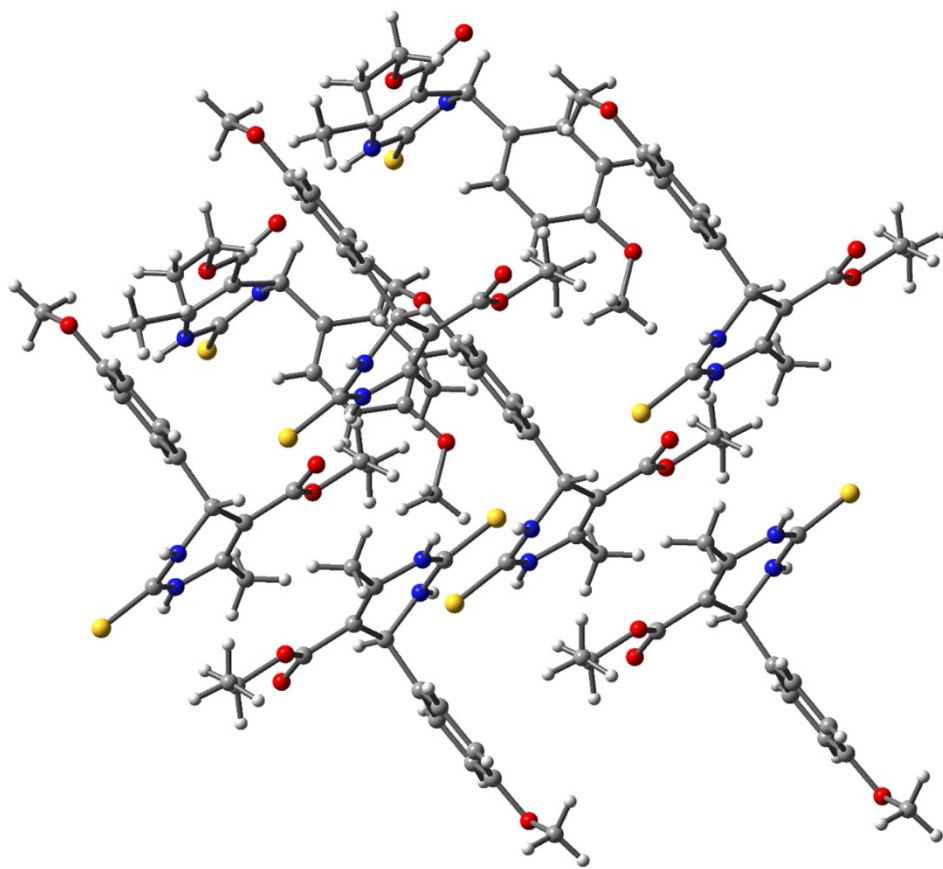

**Figure S6:** Structure of complex formed by 8 molecules of **1.3**.

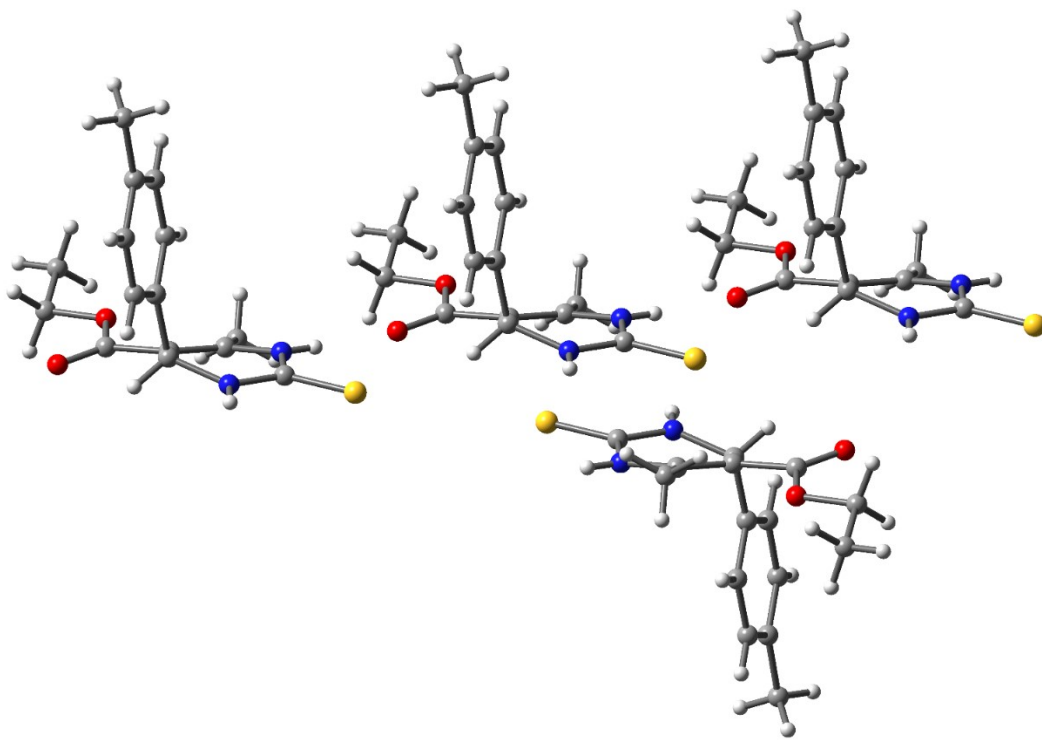

**Figure S7:** Structure of complex formed by 4 molecules of **1.4**.

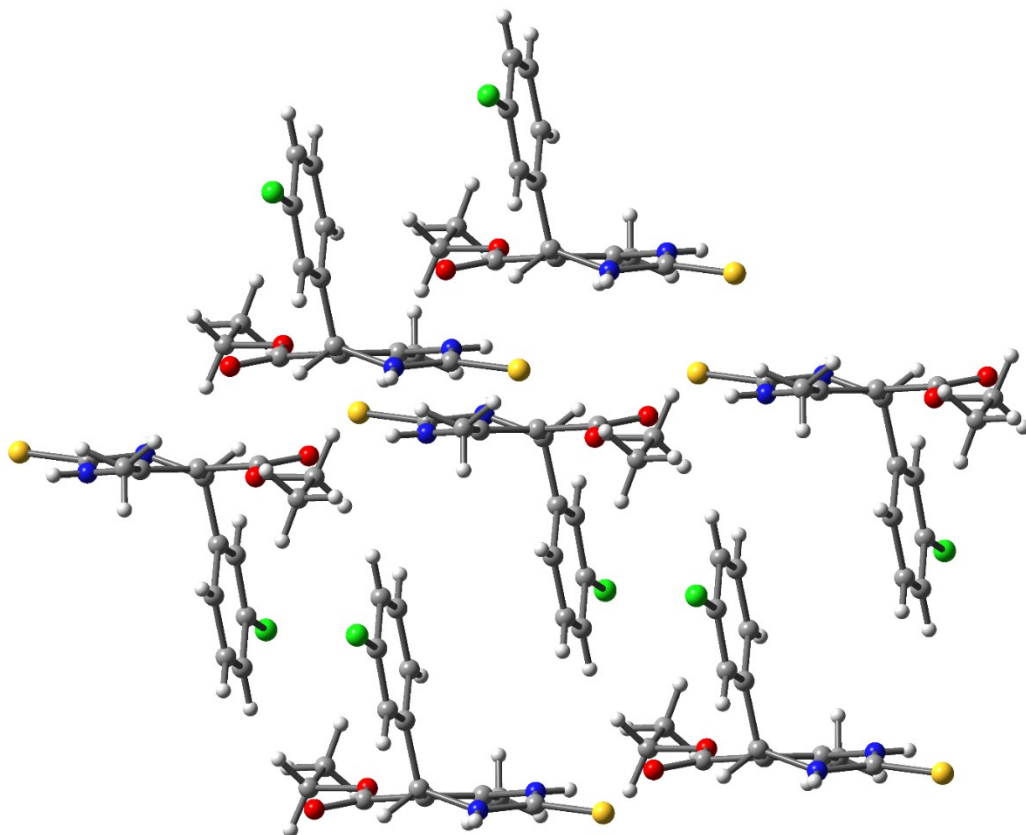

**Figure S8:** Structure of complex formed by 7 molecules of **1.5**.

### 3. NMR spectra of Compounds 1.1-1.5.

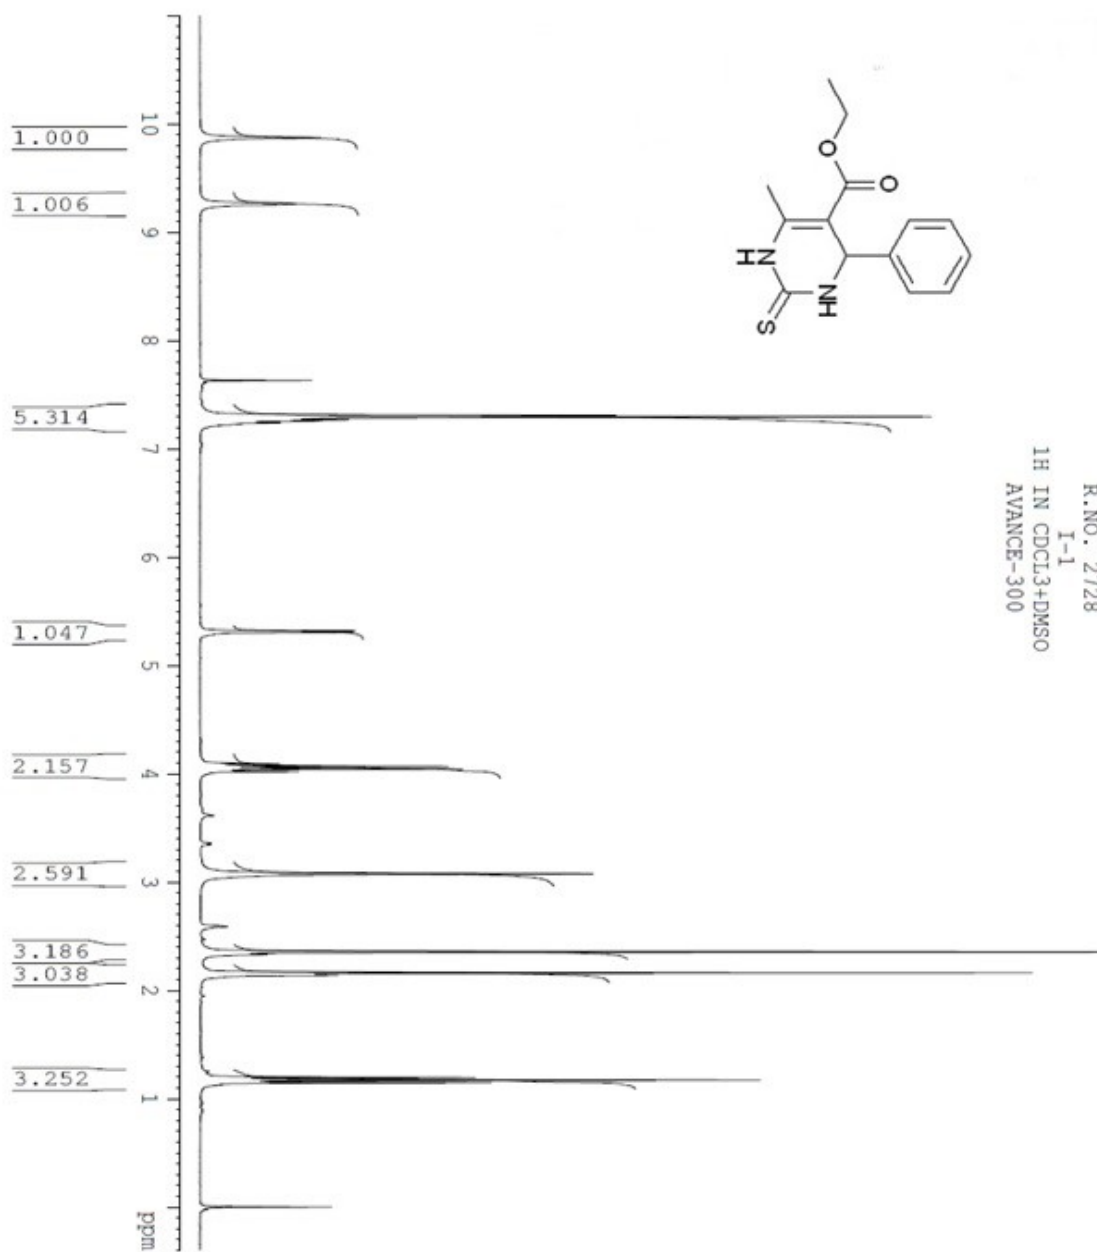

Figure S9: <sup>1</sup>H NMR of Compound 1.1

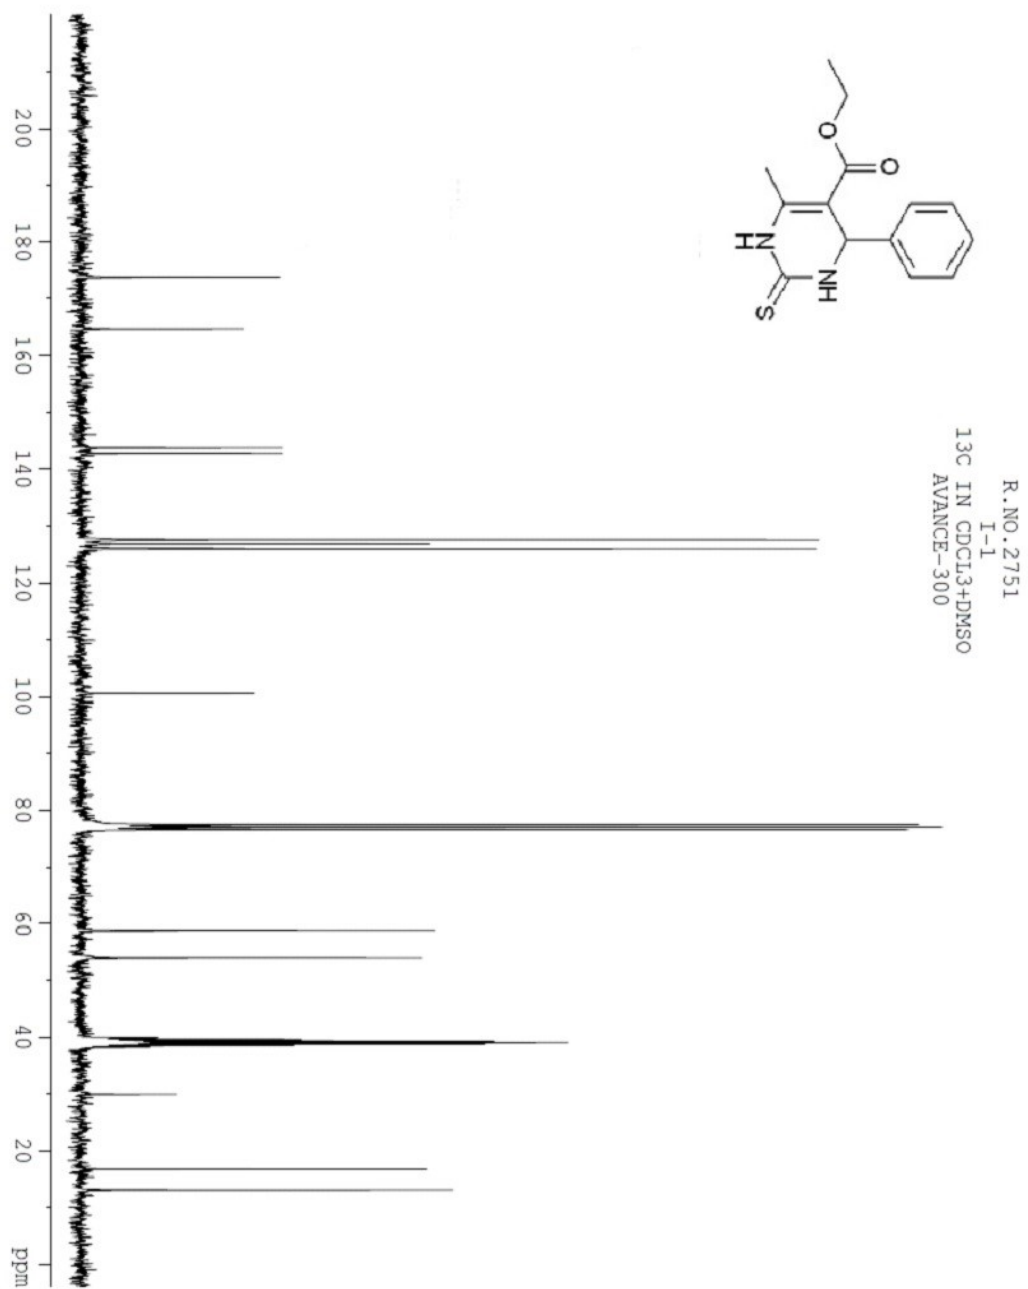

Figure S10: <sup>13</sup>C NMR of Compound 1.1

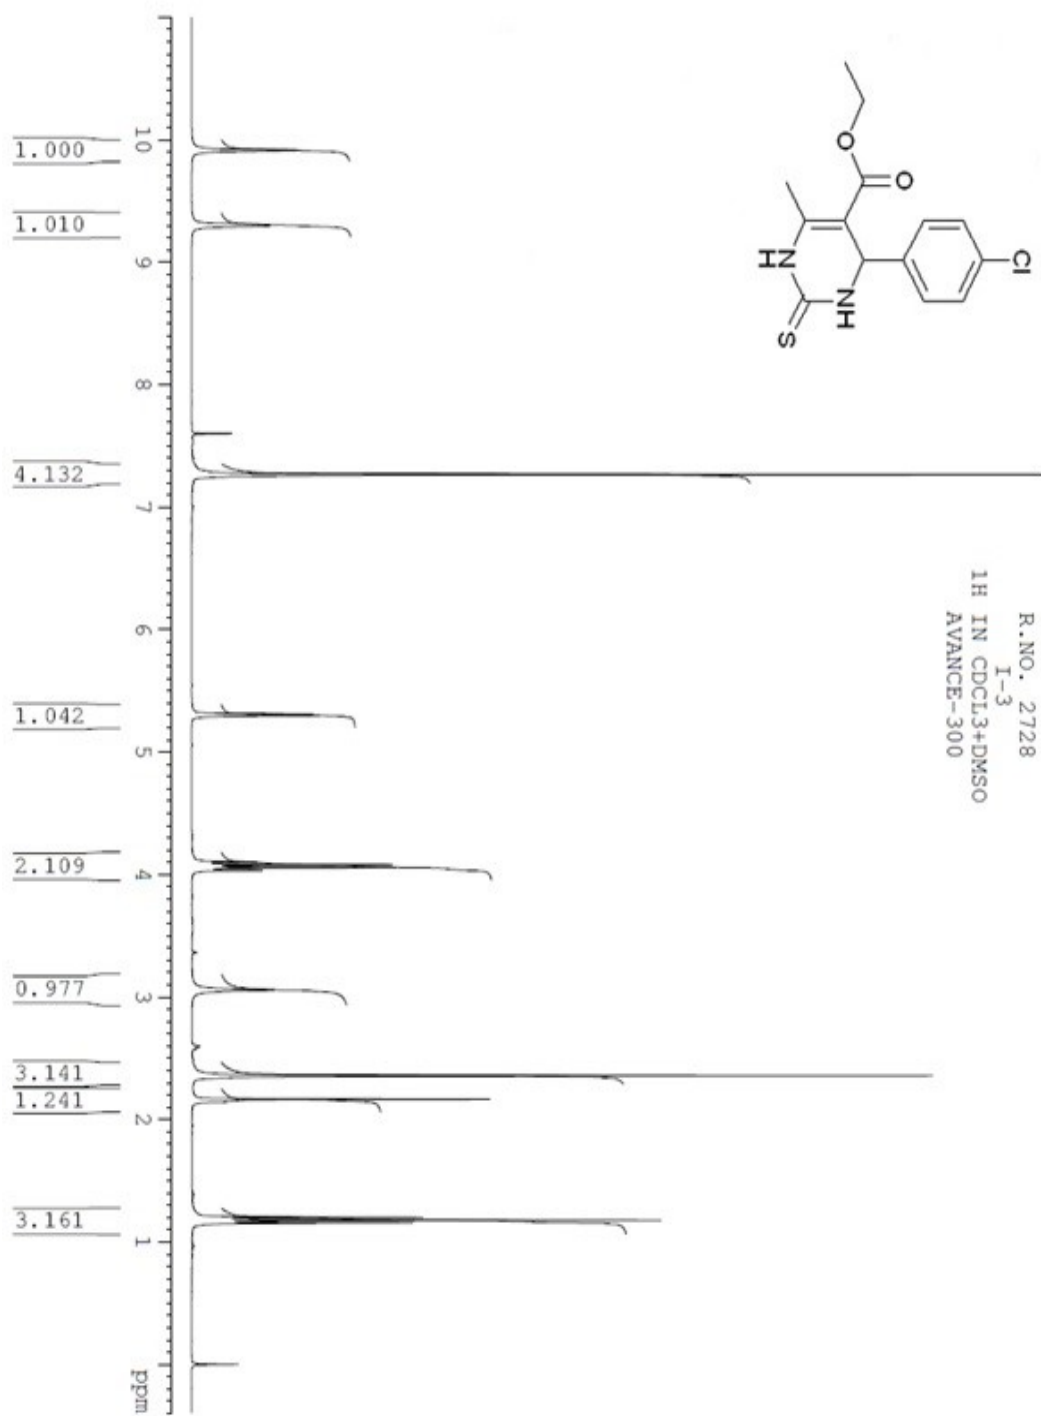

Figure S11  $^1\text{H}$  NMR of Compound 1.2



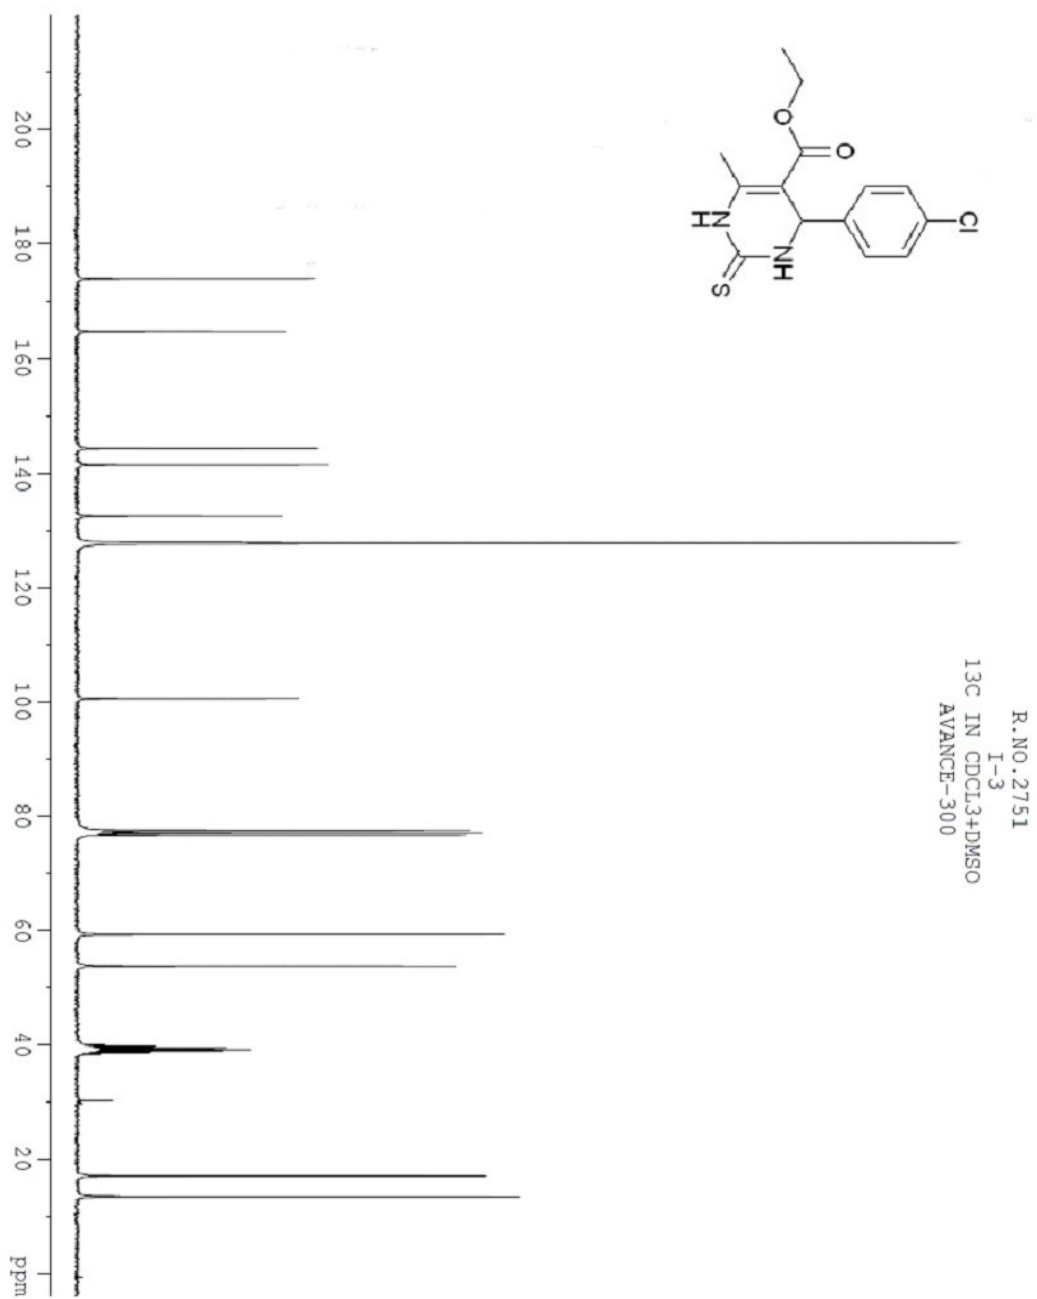

**Figure S12:** <sup>13</sup>C NMR of Compound 1.2

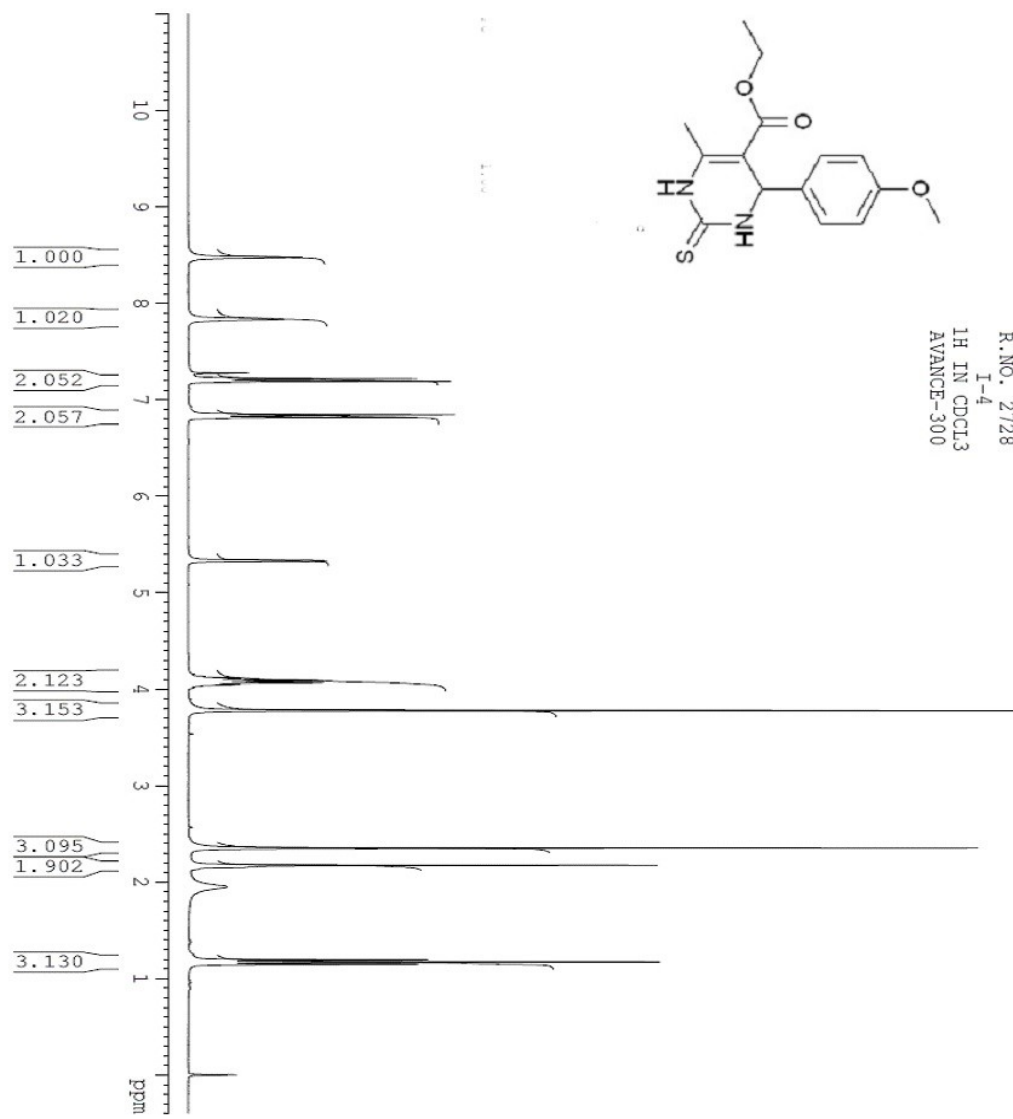

**Figure S13:**  $^1\text{H}$  NMR of Compound 1.3

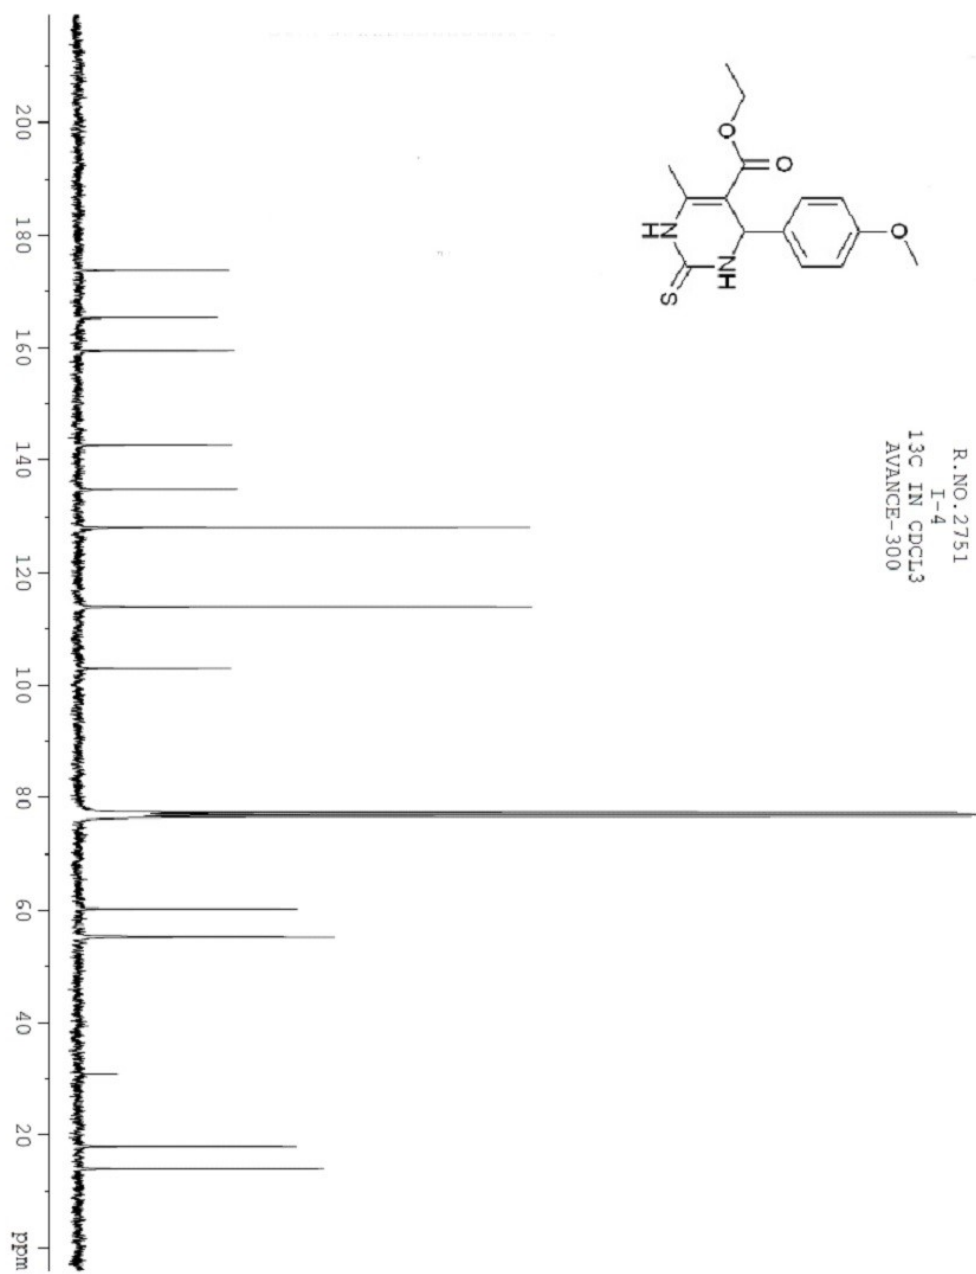

Figure S14:  $^{13}\text{C}$  NMR of Compound 1.3

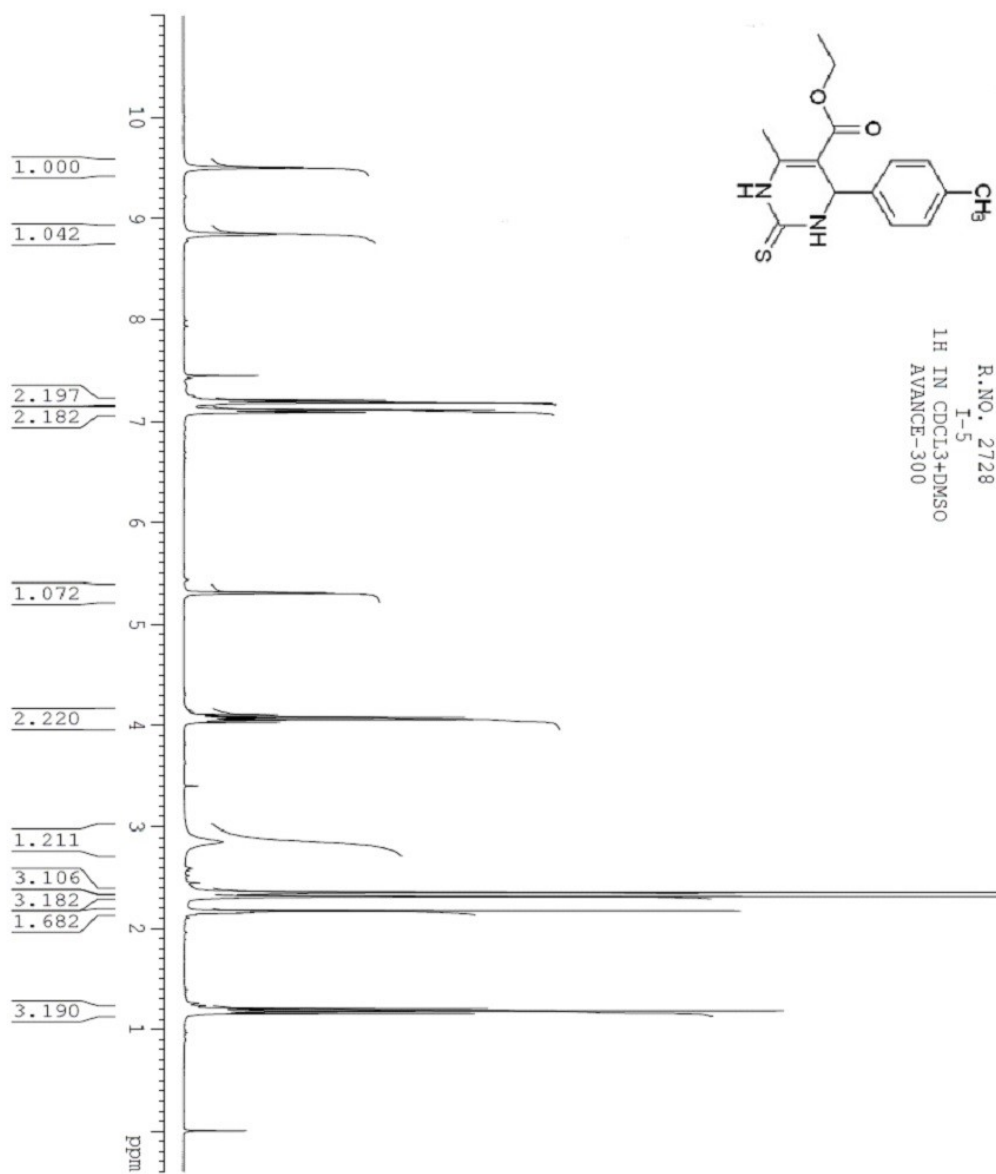

Figure S15: <sup>1</sup>H NMR of Compound 1.4

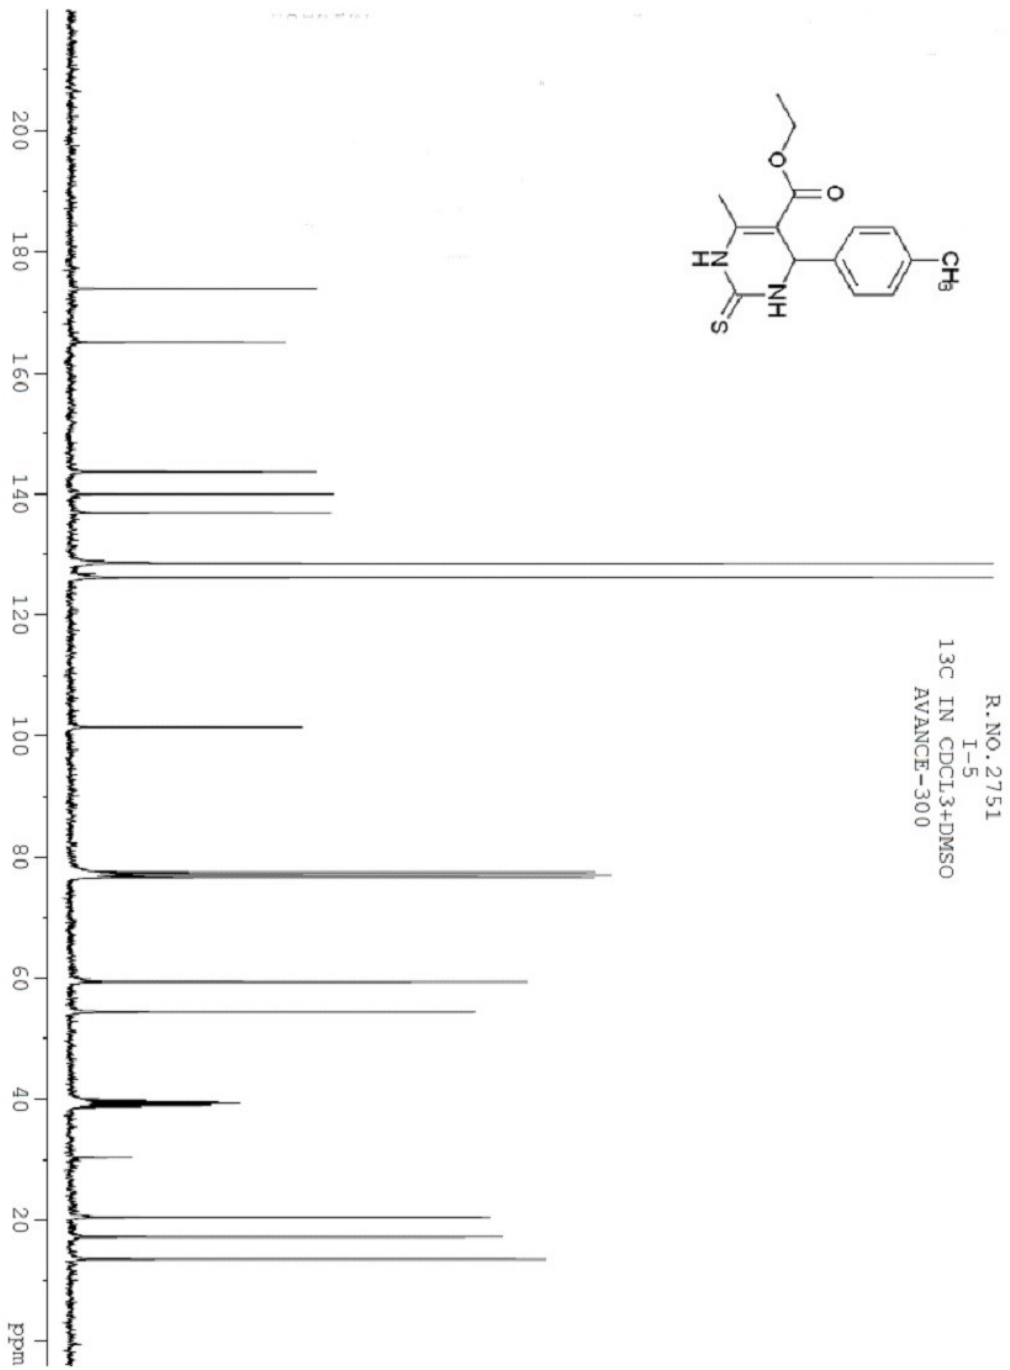

**Figure S16:**  $^{13}\text{C}$  NMR of Compound 1.4

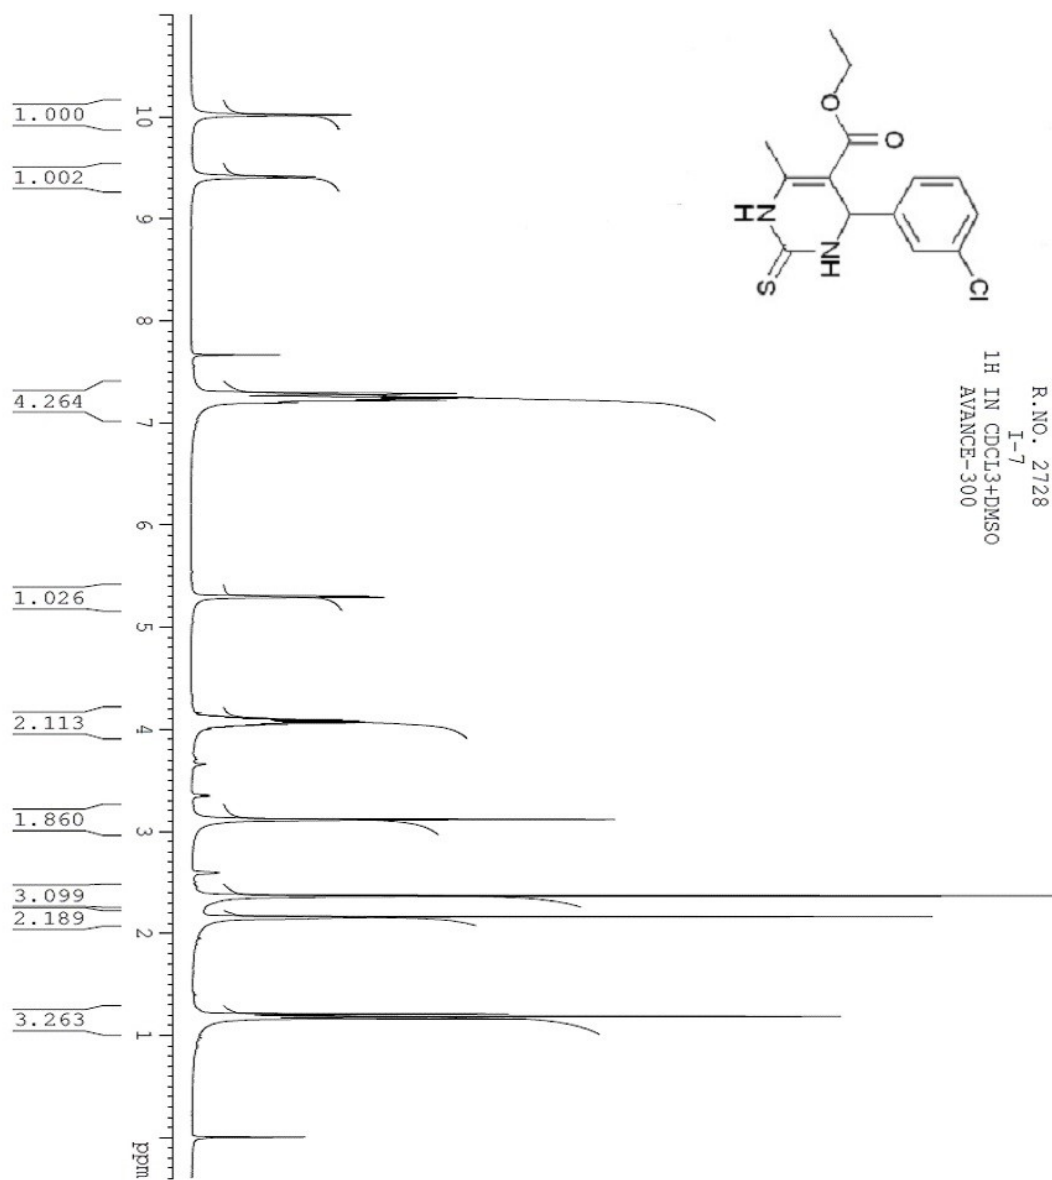

**Figure S17:** <sup>1</sup>H NMR of Compound 1.5

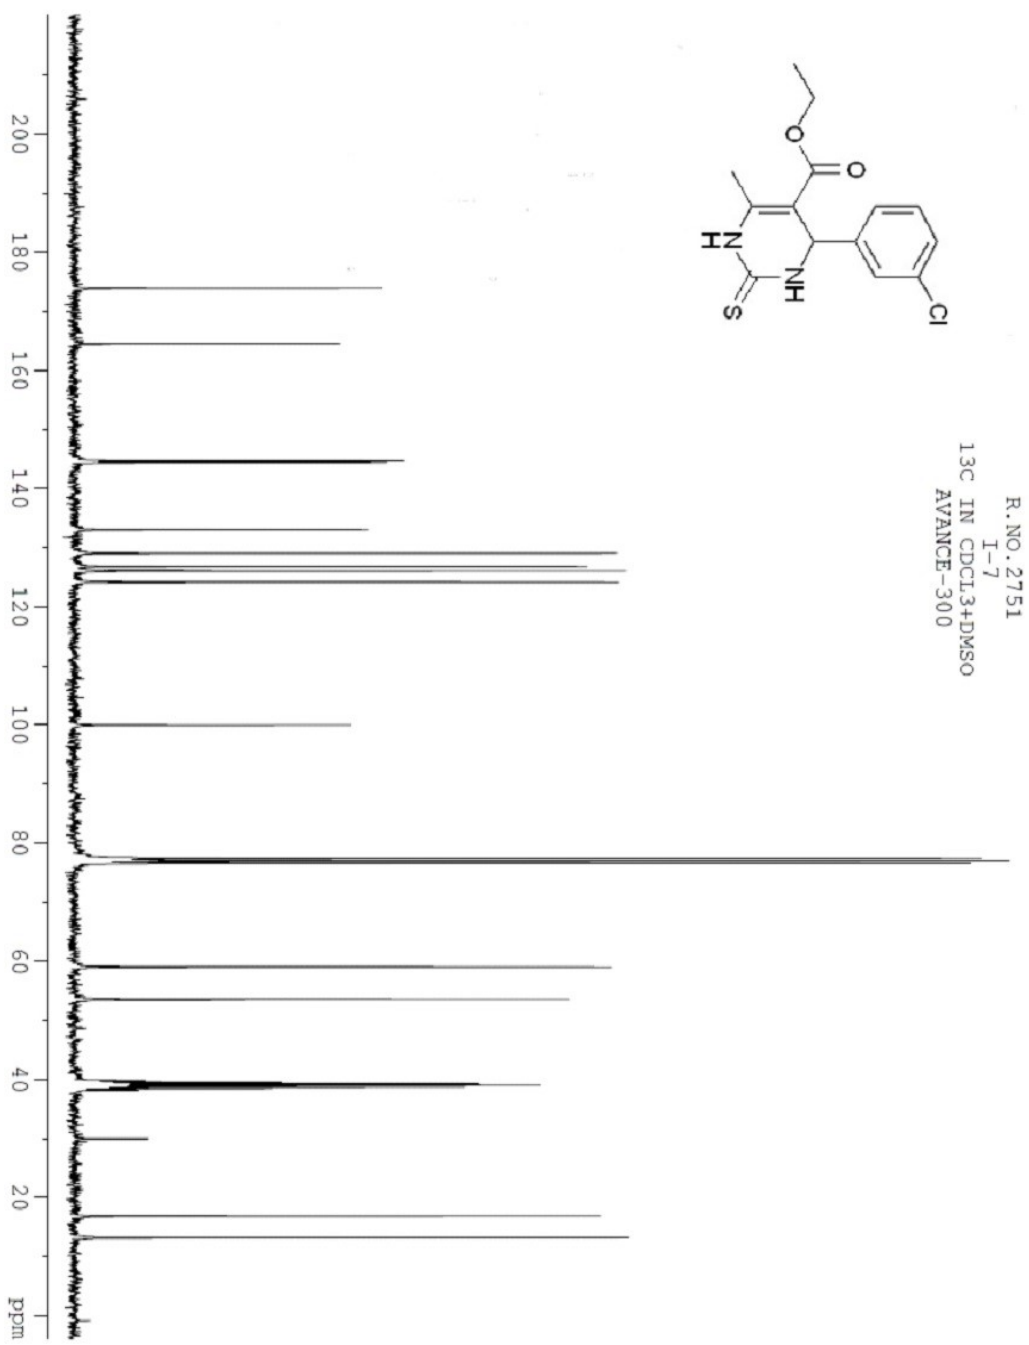

Figure S18:  $^{13}\text{C}$  NMR of Compound 1.5

## 4. CheckCIF of compound 1.3.

### checkCIF/PLATON (basic structural check)

Structure factors have been supplied for datablock(s) VPS\_I\_4\_0ma

THIS REPORT IS FOR GUIDANCE ONLY. IF USED AS PART OF A REVIEW PROCEDURE FOR PUBLICATION, IT SHOULD NOT REPLACE THE EXPERTISE OF AN EXPERIENCED CRYSTALLOGRAPHIC REFEREE.

No syntax errors found.  
Please wait while processing ....

[CIF dictionary](#)  
[Interpreting this report](#)

[Structure factor report](#)

#### Datablock: VPS\_I\_4\_0ma

Bond precision: C-C = 0.0037 Å Wavelength=0.71073  
Cell: a=18.2332(17) b=7.3341(6) c=25.197(2)  
alpha=90 beta=101.888(4) gamma=90  
Temperature: 296 K

|                        | Calculated      | Reported        |
|------------------------|-----------------|-----------------|
| Volume                 | 3297.2(5)       | 3297.2(5)       |
| Space group            | C 2/c           | C 1 2/c 1       |
| Hall group             | -C 2yc          | -C 2yc          |
| Moiety formula         | C15 H18 N2 O3 S | C15 H18 N2 O3 S |
| Sum formula            | C15 H18 N2 O3 S | C15 H18 N2 O3 S |
| Mr                     | 306.37          | 306.39          |
| Dx, g cm <sup>-3</sup> | 1.234           | 1.234           |
| Z                      | 8               | 8               |
| Mu (mm <sup>-1</sup> ) | 0.207           | 0.207           |
| F000                   | 1296.0          | 1297.6          |
| F000'                  | 1297.54         |                 |
| h,k,lmax               | 24,9,33         | 24,9,33         |
| Nref                   | 4126            | 4117            |
| Tmin,Tmax              | 0.952,0.959     |                 |
| Tmin'                  | 0.952           |                 |

Correction method= Not given  
Data completeness= 0.998 Theta(max)= 28.370  
R(reflections)= 0.0636( 3387) wR2(reflections)= 0.2033( 4117)  
S = 1.071 Npar= 201

The following ALERTS were generated. Each ALERT has the format  
test-name\_ALERT\_alert-type\_alert-level.  
Click on the hyperlinks for more details of the test.

#### Alert level C

|                                   |                                                  |             |
|-----------------------------------|--------------------------------------------------|-------------|
| <a href="#">PLAT220 ALERT 2 C</a> | Non-Solvent Resd 1 C Ueq(max)/Ueq(min) Range     | 3.3 Ratio   |
| <a href="#">PLAT222 ALERT 3 C</a> | Non-Solv. Resd 1 H Uiso(max)/Uiso(min) Range     | 4.2 Ratio   |
| <a href="#">PLAT242 ALERT 2 C</a> | Low 'MainMol' Ueq as Compared to Neighbors of    | C9 Check    |
| <a href="#">PLAT601 ALERT 2 C</a> | Structure Contains Solvent Accessible VOIDS of . | 91 Ang**3   |
| <a href="#">PLAT906 ALERT 3 C</a> | Large K Value in the Analysis of Variance .....  | 7.815 Check |
| <a href="#">PLAT906 ALERT 3 C</a> | Large K Value in the Analysis of Variance .....  | 2.153 Check |
| <a href="#">PLAT911 ALERT 3 C</a> | Missing FCF Refl Between Thmin & STh/L= 0.600    | 2 Report    |
| <a href="#">PLAT918 ALERT 3 C</a> | Reflection(s) with I(obs) much Smaller I(calc) . | 2 Check     |



● Alert level G

|                                   |                                                  |        |             |
|-----------------------------------|--------------------------------------------------|--------|-------------|
| <a href="#">PLAT072 ALERT 2 G</a> | SHELXL First Parameter in WGHT Unusually Large   | 0.11   | Report      |
| <a href="#">PLAT083 ALERT 2 G</a> | SHELXL Second Parameter in WGHT Unusually Large  | 5.15   | Why ?       |
| <a href="#">PLAT720 ALERT 4 G</a> | Number of Unusual/Non-Standard Labels .....      | 1      | Note        |
| <a href="#">PLAT793 ALERT 4 G</a> | Model has Chirality at C6 (Centro SPGR)          | R      | Verify      |
| <a href="#">PLAT883 ALERT 1 G</a> | No Info/Value for _atom_sites_solution_primary . |        | Please Do ! |
| <a href="#">PLAT910 ALERT 3 G</a> | Missing # of FCF Reflection(s) Below Theta(Min). | 1      | Note        |
| <a href="#">PLAT912 ALERT 4 G</a> | Missing # of FCF Reflections Above STh/L= 0.600  | 5      | Note        |
| <a href="#">PLAT960 ALERT 3 G</a> | Number of Intensities with I < - 2*sig(I) ...    | 12     | Check       |
| <a href="#">PLAT978 ALERT 2 G</a> | Number C-C Bonds with Positive Residual Density. | 8      | Info        |
| <a href="#">PLAT983 ALERT 1 G</a> | The s-f"= 0.1244 Deviates from IT-Value =        | 0.1234 | Check       |

0 ALERT level A = Most likely a serious problem - resolve or explain  
 0 ALERT level B = A potentially serious problem, consider carefully  
 8 ALERT level C = Check. Ensure it is not caused by an omission or oversight  
 10 ALERT level G = General information/check it is not something unexpected

2 ALERT type 1 CIF construction/syntax error, inconsistent or missing data  
 6 ALERT type 2 Indicator that the structure model may be wrong or deficient  
 7 ALERT type 3 Indicator that the structure quality may be low  
 3 ALERT type 4 Improvement, methodology, query or suggestion  
 0 ALERT type 5 Informative message, check

It is advisable to attempt to resolve as many as possible of the alerts in all categories. Often the minor alerts point to easily fixed oversights, errors and omissions in your CIF or refinement strategy, so attention to these fine details can be worthwhile. In order to resolve some of the more serious problems it may be necessary to carry out additional measurements or structure refinements. However, the purpose of your study may justify the reported deviations and the more serious of these should normally be commented upon in the discussion or experimental section of a paper or in the "special\_details" fields of the CIF. checkCIF was carefully designed to identify outliers and unusual parameters, but every test has its limitations and alerts that are not important in a particular case may appear. Conversely, the absence of alerts does not guarantee there are no aspects of the results needing attention. It is up to the individual to critically assess their own results and, if necessary, seek expert advice.

#### Publication of your CIF in IUCr journals

A basic structural check has been run on your CIF. These basic checks will be run on all CIFs submitted for publication in IUCr journals (*Acta Crystallographica*, *Journal of Applied Crystallography*, *Journal of Synchrotron Radiation*); however, if you intend to submit to *Acta Crystallographica Section C* or *E* or *IUCrData*, you should make sure that [full publication checks](#) are run on the final version of your CIF prior to submission.

#### Publication of your CIF in other journals

Please refer to the *Notes for Authors* of the relevant journal for any special instructions relating to CIF submission.



## 5. CheckCIF of compound 1.4.

### checkCIF/PLATON (basic structural check)

Structure factors have been supplied for datablock(s) VPS\_I\_5\_0m

THIS REPORT IS FOR GUIDANCE ONLY. IF USED AS PART OF A REVIEW PROCEDURE FOR PUBLICATION, IT SHOULD NOT REPLACE THE EXPERTISE OF AN EXPERIENCED CRYSTALLOGRAPHIC REFEREE.

No syntax errors found.  
Please wait while processing ....

[CIF dictionary](#)  
[Interpreting this report](#)

[Structure factor report](#)

#### Datablock: VPS\_I\_5\_0m

|                    |                                   |                                 |
|--------------------|-----------------------------------|---------------------------------|
| Bond precision:    | C-C = 0.0025 A                    | Wavelength=0.71073              |
| Cell:              | a=7.3603(10)    b=9.4648(12)      | c=12.2076(16)                   |
|                    | alpha=74.216(4)    beta=88.729(4) | gamma=69.819(4)                 |
| Temperature:       | 296 K                             |                                 |
| Volume             | Calculated<br>765.70(18)          | Reported<br>765.70(18)          |
| Space group        | P -1                              | P -1                            |
| Hall group         | -P 1                              | -P 1                            |
| Moiety formula     | C15 H18 N2 O2 S                   | C15 H18 N2 O2 S                 |
| Sum formula        | C15 H18 N2 O2 S                   | C15 H18 N2 O2 S                 |
| Mr                 | 290.37                            | 290.39                          |
| Dx, g cm-3         | 1.260                             | 1.259                           |
| Z                  | 2                                 | 2                               |
| Mu (mm-1)          | 0.214                             | 0.214                           |
| F000               | 308.0                             | 308.4                           |
| F000'              | 308.36                            |                                 |
| h,k,lmax           | 9,12,15                           | 9,12,15                         |
| Nref               | 3399                              | 3387                            |
| Tmin,Tmax          | 0.954,0.962                       |                                 |
| Tmin'              | 0.954                             |                                 |
| Correction method= | Not given                         |                                 |
| Data completeness= | 0.996                             | Theta(max)= 27.150              |
| R(reflections)=    | 0.0423( 2926)                     | wR2(reflections)= 0.1298( 3387) |
| S =                | 1.067                             | Npar= 192                       |

The following ALERTS were generated. Each ALERT has the format  
test-name\_ALERT\_alert-type\_alert-level.  
Click on the hyperlinks for more details of the test.

#### Alert level C

[PLAT193 ALERT 1 C](#) Cell and Diffraction Temperatures Differ by .... 3 Degree

#### Alert level G

|                                   |                                                  |              |
|-----------------------------------|--------------------------------------------------|--------------|
| <a href="#">PLAT154 ALERT 1 G</a> | The s.u.'s on the Cell Angles are Equal ..(Note) | 0.004 Degree |
| <a href="#">PLAT199 ALERT 1 G</a> | Reported_cell_measurement_temperature ..... (K)  | 293 Check    |
| <a href="#">PLAT720 ALERT 4 G</a> | Number of Unusual/Non-Standard Labels .....      | 1 Note       |
| <a href="#">PLAT793 ALERT 4 G</a> | Model has Chirality at C6 (Centro SPGR)          | R Verify     |
| <a href="#">PLAT883 ALERT 1 G</a> | No Info/Value for_atom_sites_solution_primary .  | Please Do !  |
| <a href="#">PLAT910 ALERT 3 G</a> | Missing # of FCF Reflection(s) Below Theta(Min). | 3 Note       |

|                                   |                                                  |       |       |
|-----------------------------------|--------------------------------------------------|-------|-------|
| <a href="#">PLAT912 ALERT 4 G</a> | Missing # of FCF Reflections Above STh/L= 0.600  | 10    | Note  |
| <a href="#">PLAT960 ALERT 3 G</a> | Number of Intensities with I < - 2*sig(I) ...    | 4     | Check |
| <a href="#">PLAT978 ALERT 2 G</a> | Number C-C Bonds with Positive Residual Density. | 5     | Info  |
| <a href="#">PLAT983 ALERT 1 G</a> | The S-f"= 0.1244 Deviates from IT-Value = 0.1234 | Check |       |

---

0 ALERT level A = Most likely a serious problem - resolve or explain  
0 ALERT level B = A potentially serious problem, consider carefully  
1 ALERT level C = Check. Ensure it is not caused by an omission or oversight  
10 ALERT level G = General information/check it is not something unexpected

5 ALERT type 1 CIF construction/syntax error, inconsistent or missing data  
1 ALERT type 2 Indicator that the structure model may be wrong or deficient  
2 ALERT type 3 Indicator that the structure quality may be low  
3 ALERT type 4 Improvement, methodology, query or suggestion  
0 ALERT type 5 Informative message, check

---

It is advisable to attempt to resolve as many as possible of the alerts in all categories. Often the minor alerts point to easily fixed oversights, errors and omissions in your CIF or refinement strategy, so attention to these fine details can be worthwhile. In order to resolve some of the more serious problems it may be necessary to carry out additional measurements or structure refinements. However, the purpose of your study may justify the reported deviations and the more serious of these should normally be commented upon in the discussion or experimental section of a paper or in the "special details" fields of the CIF. checkCIF was carefully designed to identify outliers and unusual parameters, but every test has its limitations and alerts that are not important in a particular case may appear. Conversely, the absence of alerts does not guarantee there are no aspects of the results needing attention. It is up to the individual to critically assess their own results and, if necessary, seek expert advice.

### Publication of your CIF in IUCr journals

A basic structural check has been run on your CIF. These basic checks will be run on all CIFs submitted for publication in IUCr journals (*Acta Crystallographica*, *Journal of Applied Crystallography*, *Journal of Synchrotron Radiation*); however, if you intend to submit to *Acta Crystallographica Section C* or *E* or *IUCrData*, you should make sure that [full publication checks](#) are run on the final version of your CIF prior to submission.

### Publication of your CIF in other journals

Please refer to the *Notes for Authors* of the relevant journal for any special instructions relating to CIF submission.

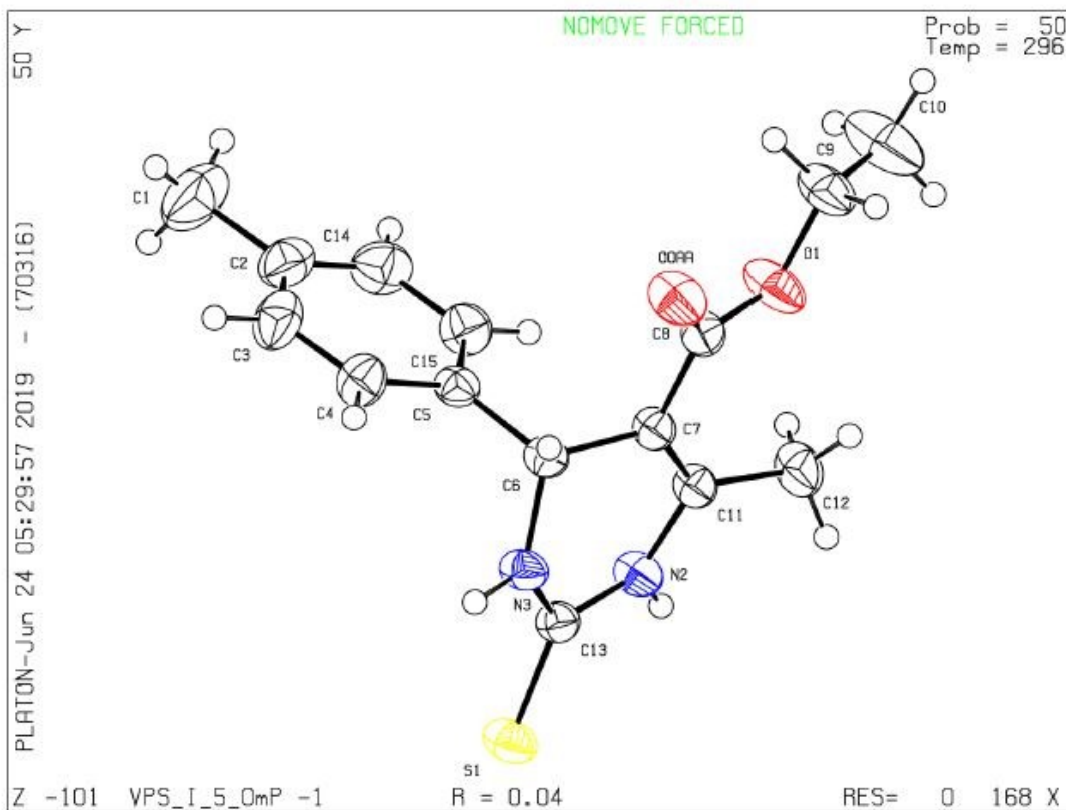

## 6. CheckCIF of compound 1.5.

### checkCIF/PLATON (basic structural check)

Structure factors have been supplied for datablock(s) VPS\_I\_7\_0m

THIS REPORT IS FOR GUIDANCE ONLY. IF USED AS PART OF A REVIEW PROCEDURE FOR PUBLICATION, IT SHOULD NOT REPLACE THE EXPERTISE OF AN EXPERIENCED CRYSTALLOGRAPHIC REFEREE.

No syntax errors found.  
Please wait while processing ....

[CIF dictionary](#)  
[Interpreting this report](#)

[Structure factor report](#)

#### Datablock: VPS\_I\_7\_0m

|                        |                                             |                                                        |
|------------------------|---------------------------------------------|--------------------------------------------------------|
| Bond precision:        | C-C = 0.0024 Å                              | Wavelength=0.71073                                     |
| Cell:                  | a=7.3066(6)    b=10.4657(8)    c=10.6788(9) | alpha=107.568(3)    beta=90.583(3)    gamma=107.829(2) |
| Temperature:           | 296 K                                       |                                                        |
|                        | Calculated                                  | Reported                                               |
| Volume                 | 736.37(10)                                  | 736.37(10)                                             |
| Space group            | P -1                                        | P -1                                                   |
| Hall group             | -P 1                                        | -P 1                                                   |
| Moiety formula         | C14 H15 Cl N2 O2 S                          | C14 H15 Cl N2 O2 S                                     |
| Sum formula            | C14 H15 Cl N2 O2 S                          | C14 H15 Cl N2 O2 S                                     |
| Mr                     | 310.79                                      | 310.81                                                 |
| Dx, g cm <sup>-3</sup> | 1.402                                       | 1.402                                                  |
| Z                      | 2                                           | 2                                                      |
| Mu (mm <sup>-1</sup> ) | 0.403                                       | 0.403                                                  |
| F000                   | 324.0                                       | 324.7                                                  |
| F000'                  | 324.66                                      |                                                        |
| h,k,lmax               | 9,13,13                                     | 9,13,13                                                |
| Nref                   | 3279                                        | 3263                                                   |
| Tmin,Tmax              | 0.901,0.923                                 |                                                        |
| Tmin'                  | 0.901                                       |                                                        |
| Correction method=     | Not given                                   |                                                        |
| Data completeness=     | 0.995                                       | Theta(max)= 27.160                                     |
| R(reflections)=        | 0.0384( 2892)                               | wR2(reflections)= 0.1156( 3263)                        |
| S =                    | 1.076                                       | Npar= 191                                              |

The following ALERTS were generated. Each ALERT has the format  
test-name\_ALERT\_alert-type\_alert-level.  
Click on the hyperlinks for more details of the test.

#### Alert level C

|                                   |                                                  |           |
|-----------------------------------|--------------------------------------------------|-----------|
| <a href="#">PLAT220 ALERT 2 C</a> | Non-Solvent Resd 1 C Ueq(max)/Ueq(min) Range     | 3.3 Ratio |
| <a href="#">PLAT222 ALERT 3 C</a> | Non-Solv. Resd 1 H Uiso(max)/Uiso(min) Range     | 4.2 Ratio |
| <a href="#">PLAT242 ALERT 2 C</a> | Low 'MainMol' Ueq as Compared to Neighbors of    | C8 Check  |
| <a href="#">PLAT910 ALERT 3 C</a> | Missing # of FCF Reflection(s) Below Theta(Min). | 5 Note    |
| <a href="#">PLAT911 ALERT 3 C</a> | Missing FCF Refl Between Thmin & STh/L= 0.600    | 2 Report  |

#### Alert level G

|                                   |                                             |          |
|-----------------------------------|---------------------------------------------|----------|
| <a href="#">PLAT720 ALERT 4 G</a> | Number of Unusual/Non-Standard Labels ..... | 1 Note   |
| <a href="#">PLAT793 ALERT 4 G</a> | Model has Chirality at C5 (Centro SPGR)     | R Verify |

|                                   |                                                  |              |
|-----------------------------------|--------------------------------------------------|--------------|
| <a href="#">PLAT883 ALERT 1 G</a> | No Info/Value for _atom_sites_solution_primary . | Please Do !  |
| <a href="#">PLAT912 ALERT 4 G</a> | Missing # of FCF Reflections Above STh/L= 0.600  | 9 Note       |
| <a href="#">PLAT960 ALERT 3 G</a> | Number of Intensities with I < - 2*sig(I) ...    | 6 Check      |
| <a href="#">PLAT978 ALERT 2 G</a> | Number C-C Bonds with Positive Residual Density. | 8 Info       |
| <a href="#">PLAT983 ALERT 1 G</a> | The Cl-f"= 0.1603 Deviates from IT-Value =       | 0.1585 Check |
| <a href="#">PLAT983 ALERT 1 G</a> | The S-f"= 0.1244 Deviates from IT-Value =        | 0.1234 Check |

---

0 ALERT level A = Most likely a serious problem - resolve or explain  
 0 ALERT level B = A potentially serious problem, consider carefully  
 5 ALERT level C = Check. Ensure it is not caused by an omission or oversight  
 8 ALERT level G = General information/check it is not something unexpected

3 ALERT type 1 CIF construction/syntax error, inconsistent or missing data  
 3 ALERT type 2 Indicator that the structure model may be wrong or deficient  
 4 ALERT type 3 Indicator that the structure quality may be low  
 3 ALERT type 4 Improvement, methodology, query or suggestion  
 0 ALERT type 5 Informative message, check

---

It is advisable to attempt to resolve as many as possible of the alerts in all categories. Often the minor alerts point to easily fixed oversights, errors and omissions in your CIF or refinement strategy, so attention to these fine details can be worthwhile. In order to resolve some of the more serious problems it may be necessary to carry out additional measurements or structure refinements. However, the purpose of your study may justify the reported deviations and the more serious of these should normally be commented upon in the discussion or experimental section of a paper or in the "special\_details" fields of the CIF. checkCIF was carefully designed to identify outliers and unusual parameters, but every test has its limitations and alerts that are not important in a particular case may appear. Conversely, the absence of alerts does not guarantee there are no aspects of the results needing attention. It is up to the individual to critically assess their own results and, if necessary, seek expert advice.

#### Publication of your CIF in IUCr journals

A basic structural check has been run on your CIF. These basic checks will be run on all CIFs submitted for publication in IUCr journals (*Acta Crystallographica*, *Journal of Applied Crystallography*, *Journal of Synchrotron Radiation*); however, if you intend to submit to *Acta Crystallographica Section C* or *E* or *IUCrData*, you should make sure that [full publication checks](#) are run on the final version of your CIF prior to submission.

#### Publication of your CIF in other journals

Please refer to the *Notes for Authors* of the relevant journal for any special instructions relating to CIF submission.

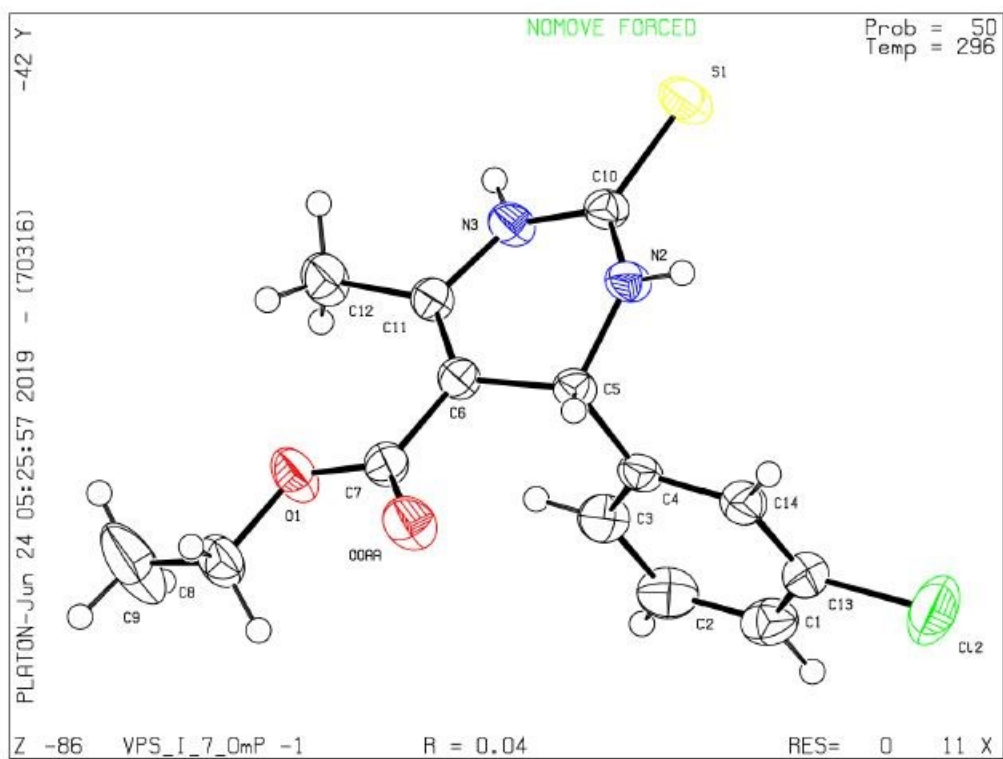

Supplement: d1ra03969e1.pdf [file d1ra03969e1.pdf]
